# Supplementary material for: Comparison of radiation belts electron fluxes simultaneously measured with PROBA-V/EPT and RBSP/MagEIS instruments
Source: Copernicus journal article supplement (doi:10.5194/angeo-2023-8), 2023-03-27
Supplement: Supplementary file [file angeo-2023-8-RC1-supplement.pdf]

Dear Editor,

I reviewed the article “Comparison of radiation belts electron fluxes simultaneously measured with PROBA-V/EPT and RBSP/MagEIS instruments” by Alexandre Winant et al. and submitted to AnnGeo.

The article is based on the comparison of electron radiation belt fluxes at low Earth orbit (LEO) and at an elliptic orbit as GTO. Proba-V/EPT is used at LEO. Van Allen Probes are used at GTO (MagEIS instrument). The difference in latitude causes the flux difference that one needs to know in order to better understand the physical processes occurring during the bounce motion of trapped electrons. Fluxes at LEO are also compared with the AE8 model. The comparison of the fluxes is made in a statistical way in the outer belt at both relativistic and ultra-relativistic energies during the year 2014. The work is very well done and results are well established. Another very interesting comparison is done at low L-shells for the few conjunction points that were found. In all cases, differences in flux are well established. Results are at the state of the art and very interesting. The article is also well written but the organization is not fine (see my point 3 below). I am finding missing references too which I would like to see cited, including ones from the authors themselves (my point 1). Also, there are two recent publications, which the authors probably do not know, but with similar results and comparisons made. It is important to relate this study with the two articles. These are the main recommendations I ask the authors to follow (more explanations in following). I will recommend publication of this article once the corrections are made:

### 1) Missing references:

- RBSP: cite Mauk et al. 2013
- MagEIS instrument : Blake et al. 2013
- Proba-V: cite the main article about that mission (is it Cyamukungu et al. 2014 ?)
- Arase: cite Miyoshi et al. 2018 (SSR, ERG mission)
- Radiation belt review: please cite in the introduction and refer to Ripoll, Claudepierre et al. 2020.
- Please refer to Winant master thesis for further information in giving the website link. Is it relevant to do it line 208 where it is written “A similar analysis to that shown in Figure 4 was carried out for integral fluxes but is not displayed here.”
- Please refer to Viviane Pierrard, Alexandre Winant, et al. , *Simultaneous Observations of the 23 June 2015 Intense Storm at LEO and GTO Orbits*, URSI Radio Science Letters, Vol 4, 2022, doi: 10.46620/22-0016  
In saying that preliminary comparisons were provided and discuss in this article.
- Please acknowledge that the radiation belt often evolves in the plasmasphere and that wave-particle interactions that sculpt the radiation belts will be partly controlled by the local value of the plasmaspheric density. A recent review of plasmasphere modeling is available in Ripoll J-F et al. (2023), Modeling of the cold electron plasma density for radiation belt physics, Front. Astron. Space Sci.
- The decrease in electron flux (MagEIS measurements) as pitch angle decreases is shown in Fig 2 of Ripoll et al. Ripoll, J.-F., Loridan, et al. (2019). Observations and Fokker-Planck simulations of the L-shell, energy, and pitch angle structure of Earth's electron radiation belts during quiet times. Journal of Geophysical Research: Space Physics, 124, 1125-1142. <https://doi.org/10.1029/2018JA026111>. Please cite.

## **2) Similar comparisons have recently been published in EGU sphere and should be referred to and commented**

Comparisons at LEO and GTO have recently been carried in these two articles with links given below. I am assuming is that these two articles are two recent to be known by the authors.

- 1- Please cite and discuss briefly in the introduction the results in:

<https://ieeexplore.ieee.org/abstract/document/10078924>

<https://www.sciencedirect.com/science/article/pii/S0273117723000029>

- 2- In the main text, in the analysis, please discuss and comment the differences you find between EPT and RBSP with the differences found in the above articles between CARMEN and RBSP. My understanding is that the large differences found this article with EPT-MagEIS are not found between CARMEN (2, 3) and RBSP, in particular at high energy (and knowing differences EPT-RBSP increase with energy increasing). This should be mentioned clearly to the readers and discussed (ideally explained but I am not sure explanations can be given).

## **3) The organization of the article is not fine**

- Please consider moving the methodology section before the world map section.
- Why not integrating the world map section within the “results and discussion” section.
- The “Analysis of the EPT observations” is not an adapted title: you work with both EPT and MagEIS..... Why is this section not in the “results and discussion” section.
- I suggest the 2 Instrument section becomes the 2 Instrument and method section, with 2.1 EPT, 2.2 MagEIS, 2.3 methodology
- Then, section 3 of results and discussion can have : 3.1 Analysis of the evolution of EPT and magEIS observations in 2014”, 3.2 Comparison with AE8 (formerly “world maps), 3.3 Comparison of outer belt fluxes, 3.4 Conjunction in the inner belt

## **4) Writing clearly a main result**

I am asking that in the analysis section of figure 4, a sentence is written and gives the correction factors between MagEIS and EPT for each of the 6 (L-shell, E). That sentence should be also copied in the conclusions. For instance: at  $L \sim 4, 5$ , while MagEIS  $8^\circ$  flux integral flux is  $\sim 20$  times higher than the integral flux computed with the EPT. Please make a Table if needed to be clearer.

(About line 255, please give the energy at which the comparison is made.)

So far I read in the conclusions: “but equatorial low pitch angle fluxes remain one order of magnitude higher than those at low 285 altitude in the outer belt.”. This is not accurate enough. I want clear numbers according to the (L,E) that is considered.

About the inner belt, it is written “A relatively good correlation is also obtained in the inner belt”. Ok, but you could be more precise: the one to one flux correspondence is excellent at 500-600 keV but decreases as energy increases (please give a number of the correction factor).

## 5) Other corrections

- Please rephrase “...the inner belt, mainly composed of energetic protons, extends up to  $L = 2$ , depending on the particles energy, and presents a more stable configuration. The outer radiation belt, mainly composed of electrons, is highly sensitive” There is an electron inner belt. Here you oppose a proton inner belt to an electron outer belt.
- All references are weirdly made, for instance: “the detection of a third ultra-relativistic electron belt Baker et al. (2013)”. This should be “the detection of a third ultra-relativistic electron belt (Baker et al., 2013)”
- Please rephrase “Like the EPT, the Magnetic Electron Ion Spectrometer (MagEIS) is a science class spectrometer...” EPT is a telescope. MagEIS is a spectrometer. MagEIS uses a magnetic field to deviate and count a given energy range of electrons. This is a fundamentally different instrument.... Please acknowledge. Please read and cite Blake et al. 2013 about MagEIS.
- Define clearly the ‘horns’, the ‘heart’ and the ‘arms’. You could use examples with (lat, long) if needed.
- Line 105: if we see so well the similarities between fig 1 and 2 why do we need fig 4 and 5. Change of argument: we see some similarities which require a more systematic one-to-one comparison in order to assess precisely the differences. BTW the differences found are large, so don’t say here that fluxes agree.
- Legend of fig 3: EPT is not ‘computed’ even if I understand you use Eq. 2 to build an integral flux. Rephrase.
- It is unclear how you deal with solar min and solar max. Are EPT data selected as such? Or is it just AE8? Please explain? Why AE8 is only shown at solar max and not at solar min? Show it as well.
- When you indicate “ $L \sim 4,5,6$ ” in many places; you can say first that the center L-shell value of the bin is used at  $L=4,5,6$ . This avoids using a ‘ $\sim$ ’ which gives the idea the L is not known precisely while it is. Define  $L_c$  if you need.
- Don’t write  $\sim 500$  keV. Rather write 500-600 keV. Idem for 1-2.4 MeV. Don’t use ‘ $\sim$ ’ (everywhere: text and legends)
- Line 226 in: “The same is true at  $L \sim 6$  where MagEIS flux is  $\sim 30$  times larger than for the EPT and becomes  $\sim 10$  times larger when the integral flux is computed with  $\sim 8^\circ$  pitch angle electrons”. Please write it is the spin-averaged flux.
- The end of line 259 is not understandable because disconnected from the rest of the sentence: “high, and imposed corrections for MagEIS measurements Claudepierre et al. (2015).” It is possible that it is due to the coma “, and” that should be removed.
- Columns inverted in fig 4

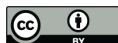

# Comparison of radiation belts electron fluxes simultaneously measured with PROBA-V/EPT and RBSP/MagEIS instruments

Alexandre Winant<sup>1,2</sup>, Viviane Pierrard<sup>1,2</sup>, and Edith Botek<sup>1</sup>

<sup>1</sup>Royal Belgian Institute for Space Aeronomy (BIRA-IASB), Brussels, Belgium

<sup>2</sup>Université Catholique de Louvain, Earth and Life Institute ELI-C, Louvain-La-Neuve, Belgium

**Correspondence:** Alexandre Winant (alexandre.winant@aeronomie.be)

**Abstract.** Relativistic radiation belt electron observations from the Energetic Particle Telescope (EPT) onboard the PROBA-V satellite are compared to those performed by the Magnetic Electron Ion Spectrometer (MagEIS) onboard the Van Allen Probes (VAPs) formerly known as the Radiation Belt Storm Probes (RBSP). Despite their very different orbits, both instruments are able to measure fluxes of electrons trapped on a given magnetic shell. In the outer belt, the comparison of high and low altitude fluxes is performed during the first three months of 2014, featuring the most intense storms of the year. In the inner belt, measurements from the two instruments are compared only at conjunction, when the satellites are physically close to each other. Due to the low number of conjunctions, the whole period of mutual operation of both instrument is used (i.e. May 2013-October 2019). The comparisons show that flux variations appear simultaneously on both spacecraft, but the fluxes observed by the EPT are almost always lower than for MagEIS, as expected from their different orbits. In addition, this difference in flux intensity increases with electron energy. During geomagnetic storms, it is also shown that dropout events (i.e. sudden depletion of electrons) in the outer belt are more pronounced at low altitudes than near geomagnetic equator. The effect of the equatorial pitch angle value of electrons is investigated in the outer belt. The results show a good agreement between observations of the two instruments, especially if low pitch angle electrons near the equator are considered.

when

## 1 Introduction

The radiation belts are two toroidal regions that surround the Earth and are filled with highly energetic charged particles trapped in its geomagnetic field. The belts are separated by a slot region with very low fluxes of particles during quiet conditions Koskinen (2022). In terms of the mcilwain1961coordinates parameter  $L$ , the inner belt, mainly composed of energetic protons, extends up to  $L = 2$ , depending on the particles energy, and presents a more stable configuration. The outer radiation belt, mainly composed of electrons, is highly sensitive to the geomagnetic activity induced by the interaction between the solar wind and Earth's magnetosphere. During geomagnetic storms, electron fluxes can decrease and increase abruptly in a few hours Pierrard and Lopez Rosson (2016); Reeves et al. (2016), and cause numerous problems to satellite systems such as surface and internal charging. Due to the hazard posed by such populations, it is of prime importance to accurately measure and understand high energy electron fluxes. Over the last decade, instruments entirely dedicated to the study of the radiation belts were developed and sent on diverse orbits around the Earth, such as MagEIS launched in 2012 onboard the Van Allen



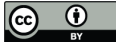

Mauk et al., 2013

ref article mission

December

25 Probes on a highly elliptic equatorial orbit, the Energetic Particle Telescope launched in 2013 on the PROBA-V satellite on  
 a low polar orbit and the more recent High-energy electron experiments (HEP) on the ARASE satellite launched in 2016  
 also in an equatorial trajectory. The Van Allen Probes, already decommissioned in 2019, led to numerous discoveries about  
 the radiation belts, including the detection of a third ultra-relativistic electron belt Baker et al. (2013) or the discovery of an  
 impenetrable barrier to ultra-relativistic electrons in the inner belt Baker et al. (2014), which was confirmed at low altitudes  
 30 by EPT observations Pierrard et al. (2019). The observations from the instruments on-board the VAPs, which have extensively  
 been validated, are thus used as a standard to compare with instruments on ARASE Sandberg et al. (2021); Szabó-Roberts et al.  
 (2021) and on the GOES-15 in geostationary orbit Baker et al. (2019). In the present paper, observations from the PROBA-  
 V/EPT are compared to observations from RBSP/MagEIS in the inner and outer belts. As for the GOES-15 satellite Baker  
 et al. (2019), there are only few moments of conjunction between PROBA-V and RBSP due to their very different orbits (low  
 35 Earth polar orbit versus highly elliptic equatorial orbit, respectively). Conjunction periods are optimal to compare and validate  
 measurements from two satellites since they are physically close to each other and share the same radiative environment. In the  
 case of the PROBA-V satellite, these conjunctions could only occur in the South Atlantic Anomaly (SAA), when the VAPs are  
 at their perigee, and thus in the inner belt. However, due to the motion of trapped particles in the geomagnetic field, both the  
 EPT and the MagEIS instrument can measure fluxes of electrons trapped on the same magnetic shells Pierrard et al. (2021).  
 40 Thus, a comparison of those two instruments allows to see the difference in fluxes observed in the outer belt at low altitudes  
 and near geomagnetic equator. A description of both instruments used in this work is given in section 2. Section 3 provides an  
 analysis of the fluxes measured by the EPT throughout 2014 and a comparison of the EPT observations throughout February  
 2014 with the AE8 Vette (1991) empirical model of the radiation belts. The fourth section describes the method that was used  
 to compare measurements from the two instruments. In the fifth section, the results of the comparison with two types of data  
 45 sets of MagEIS (level 2 spin averaged and level 3 pitch angle resolved data) are presented along with a discussion. Finally, the  
 sixth section brings the conclusions of these correlation studies.

## 2 Instruments

### 2.1 EPT

The Energetic Particle Telescope (EPT) is a science class spectrometer used to measure fluxes of high energy particles in the  
 50 radiation belts. This instrument was developed by the Center for Space Radiation (CSR) at UCLouvain in Belgium, with the  
 collaboration of the Royal Belgian Institute for Space Aeronomy and QinetiQ Space. This instrument has been launched in  
 2013 onboard the ESA satellite PROBA-V. The spacecraft was sent to a sun-synchronous LEO polar orbit at an altitude of 820  
 km, with an orbit inclination of 98.73° and a descending node at 10:30 am local time Pierrard et al. (2014). The concept of the  
 EPT is based on the Bethe-Block formula giving the relationship between the stopping power of a material and the energy of  
 55 incident charged particles, this instrument is a so called  $\Delta E - E$  telescope Cyamukungu and Grégoire (2011). The EPT was  
 designed for real-time and contamination-free measurements of charged particle spectra in the space environment and is able to  
 discriminate between electrons, protons, alpha particles and heavier ions while performing direct measurements of their energy

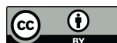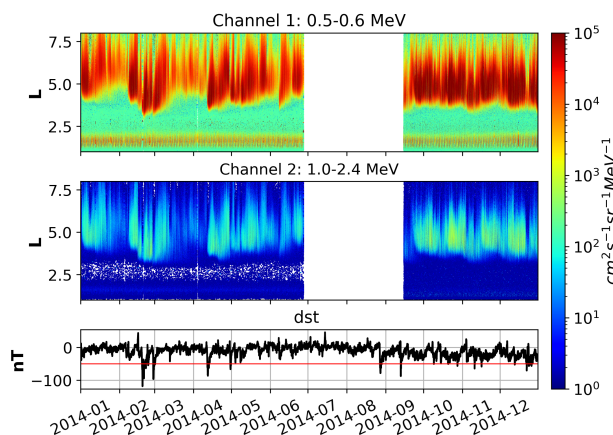

**Figure 1.** EPT electron differential fluxes as a function of time and L throughout 2014, for two different energy channels. Top: channel 1 (0.5-0.6 MeV). Middle: channel 5 (1.0-2.4 MeV). Bottom: Dst index as a function of time where red line corresponds to the constant Dst of -50 nT.

spectra Cyamukungu et al. (2014). The EPT features two energy sections. The Low Energy Section (LES) only measures lower energy electron fluxes, while the High Energy Section (HES) measures fluxes of higher energy electrons, protons and heavier particles. The EPT allows to measure flux of electrons above 500 keV in 6 energy channels, and protons above 9.5 MeV in 10 energy channels. The EPT data are available on <https://swe.ssa.esa.int/space-radiation>.

## 2.2 MagEIS

<sup>no</sup>  
Like the EPT, the Magnetic Electron Ion Spectrometer (MagEIS) is a science class spectrometer whose purpose is to measure fluxes of particles in the radiation belts. This instrument is part of a larger suite of instruments specifically designed to study the radiation belts that was carried by the NASA satellites, Radiation Belt Storm Probes (RBSP) Boyd et al. (2019). The RBSP spacecraft were twin satellites, RBSP-A and RBSP-B, launched in 2012 on Geostationary Transfer Orbit (GTO) near the geomagnetic equator, with an orbit inclination of  $\sim 10^\circ$ . This orbit is very elliptic so that at the apogee, the RBSP were near geostationary orbit ( $L \sim 6.6$ ), while the altitude of the perigee is around 600 km. The MagEIS instrument is composed of four magnetic spectrometers that measure fluxes in four energy ranges. MagEIS features a low energy unit (20-240 keV), two medium energy units (80-1200 keV) and a high energy unit (800-4800 keV) Claudepierre et al. (2015). Those combined units give a wide energy range for the measured electron fluxes (20 keV-4 MeV) on a larger number of channels than for the EPT. MagEIS data were retrieved from [https://rbsp-ect.newmexicoconsortium.org/data\\_pub/](https://rbsp-ect.newmexicoconsortium.org/data_pub/) and only the background corrected MagEIS electron fluxes have been used all along the present work.

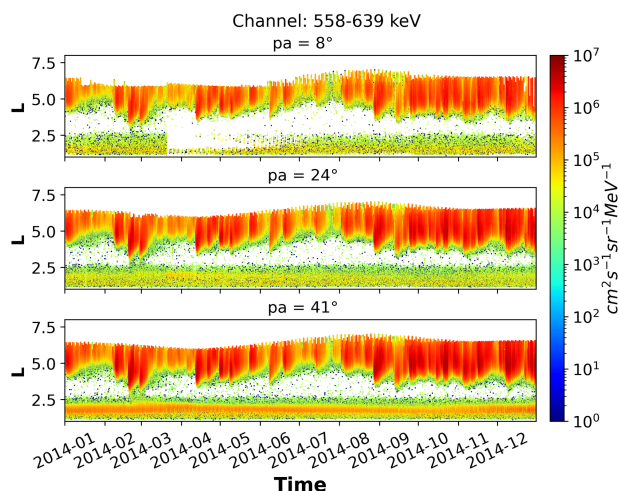

**Figure 2.** MagEIS corrected level 3 pitch angle resolved data as a function of time for 2014, as in the previous figure. The electron flux is measured in a single channel (604 keV) for different values of the pitch angle. From top to bottom, each panel shows fluxes measured in increasing pitch angle bins,  $[0^\circ, 16.36^\circ]$ ,  $[16.36^\circ, 32.72^\circ]$ ,  $[32.72^\circ, 49.09^\circ]$

### 3 Analysis of the EPT observations

75 EPT and MagEIS have operated simultaneously during six years, between 2013 and 2019. Both instruments were operational during the year of maximum solar activity, in 2014. Figure 1 shows EPT measurements of energetic electron fluxes in the radiation belts, as a function of time and the McIlwain parameter  $L$ , throughout 2014 for two different energy channels, 500-600 keV and 1000-2400 keV on top and middle panel respectively. The bottom panel on the graph shows the evolution in time of the Disturbed Storm Time (Dst) index in 2014. This index characterizes the intensity of the horizontal component of the magnetic field at the surface of the Earth in equatorial regions, and is widely used to measure the intensity of geomagnetic storms. The white area in the EPT fluxes corresponds to a lack of observations from June to September. This "hole" in the data was caused by an incident on one of the sensors of the EPT. The origin of this problem remains unknown, since no large storms, nor Solar Energetic Particle (SEP) events were observed at the time. It is known that, except during extreme events, fluxes in the inner radiation belt are quite steady. However measurements of the EPT in the inner belt appear to vary periodically. This

80 seemingly periodic variation is actually caused by the orbit of the PROBA-V satellite. Because it is travelling on a LEO orbit at 820 km, the EPT can only observe inner belt fluxes in the South Atlantic Anomaly (SAA), a region where the geomagnetic field is weaker and trapped particles can penetrate to lower altitudes.

While 2014 was the year of maximum solar activity, it can be seen both in the flux and the Dst temporal variations of Figure 1, that it was a relatively quiet year in terms of geomagnetic activity. Indeed, only 10 medium storms ( $-100\text{nT} \leq \text{Dst} < -50\text{nT}$ ) were observed and only one intense storm ( $\text{Dst} < -100\text{nT}$ ) was recorded on February 19. This is not surprising since the highest frequency of large storms is reached in the declining phase of the solar cycle Mansilla (2014); Pierrard et al. (2014).

90



repeat date

February was the month featuring the largest geomagnetic storms of the year, the one mentioned above, and another one, on the 27<sup>th</sup> during which the Dst index dropped to -96 nT. Both events were caused by Solar Energetic Particle (SEP) events (<https://umbra.nascom.nasa.gov/SEP/>). While these storms were responsible for large variations of electron fluxes in the outer belt, no storms in 2014 was intense enough to inject electrons in the inner belt, where fluxes steadily decrease during the year, unlike in 2015 Pierrard et al. (2020). The year 2014 can also be split into two periods characterized by different geomagnetic activity. During the first period, from January to August, low averaged geomagnetic activity is detected, with a mean Dst value of  $\sim -6,8$  nT. However, this is also the period that has seen the most intense storms of the year (mostly in February). The second period, extending from September to December, features a higher geomagnetic activity, with a mean Dst value of  $\sim -19,3$  nT. However, the storms that took place during this period were less intense. Because fluxes in the outer electron belts are strongly dependent on the geomagnetic activity, this distinction can also be seen in the evolution of the flux intensity in Figure 1.

Figure 2 illustrates the RBSP/MagEIS electron differential fluxes observed during 2014 (same year as in Figure 1) for  $E = 604$  keV and increasing pitch angle bins in each panel. This figure clearly shows that the flux variations are similar to those observed by EPT, and are similar for all pitch angle bins. While fluxes strongly depend on the energy of the electrons, location in the belt and on the magnetic activity, the minimum flux is always obtained for the lowest value of the pitch angle Smirnov et al. (2022); Shi et al. (2016). As illustrated by the different panels of Figure 2, the electron flux in the radiation belts decreases as the pitch angle of the electrons decreases from about  $\sim 41^\circ$  to  $\sim 8^\circ$ .

### 3.1 World Maps

Before displaying scatter plots of simultaneous observations from EPT and MagEIS, electron flux measurements from the EPT are compared to the AE-8 NASA model Vette (1991). This is an empirical model of the radiation belts based on observations from the 60s to the 70s that allows the distinction between periods of minimum and maximum of solar activity.

Figure 3 displays in the top left panel the integral electron fluxes ( $> 0.5$  MeV) on the world map as predicted by the AE8 model at an altitude of 820 km and during maximum solar activity. The top right panel in this figure shows the integral flux of electrons ( $> 0.5$  MeV, computed with equation 2, see later) measured by the EPT during February 2014 and averaged on longitude-latitude bins ( $3^\circ \times 2^\circ$ ) corresponding to the resolution of the model. The model is able to reproduce the SAA and the polar horns, however it does not show the reduced fluxes in the northern hemisphere caused by the counterpart of the SAA that can be observed with the EPT. There is also a region between the SAA and the southern horn where high intensity fluxes are observed by the EPT. Those points are not representative of the mean flux in the bin throughout February, as they are due to measurements performed during the storms and should not be directly compared with the AE8 model which is incapable to reproduce storm fluxes. Similar points can be observed at very high latitudes. The shape of the SAA predicted by the model is not exactly the same as it is observed by the EPT. Eventhough the "heart" (i.e. where fluxes are higher) is similar, the "arm" extending in the Pacific ocean at the equator is not seen in the measured data. The same structure extending over Africa is also only seen in the model.

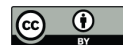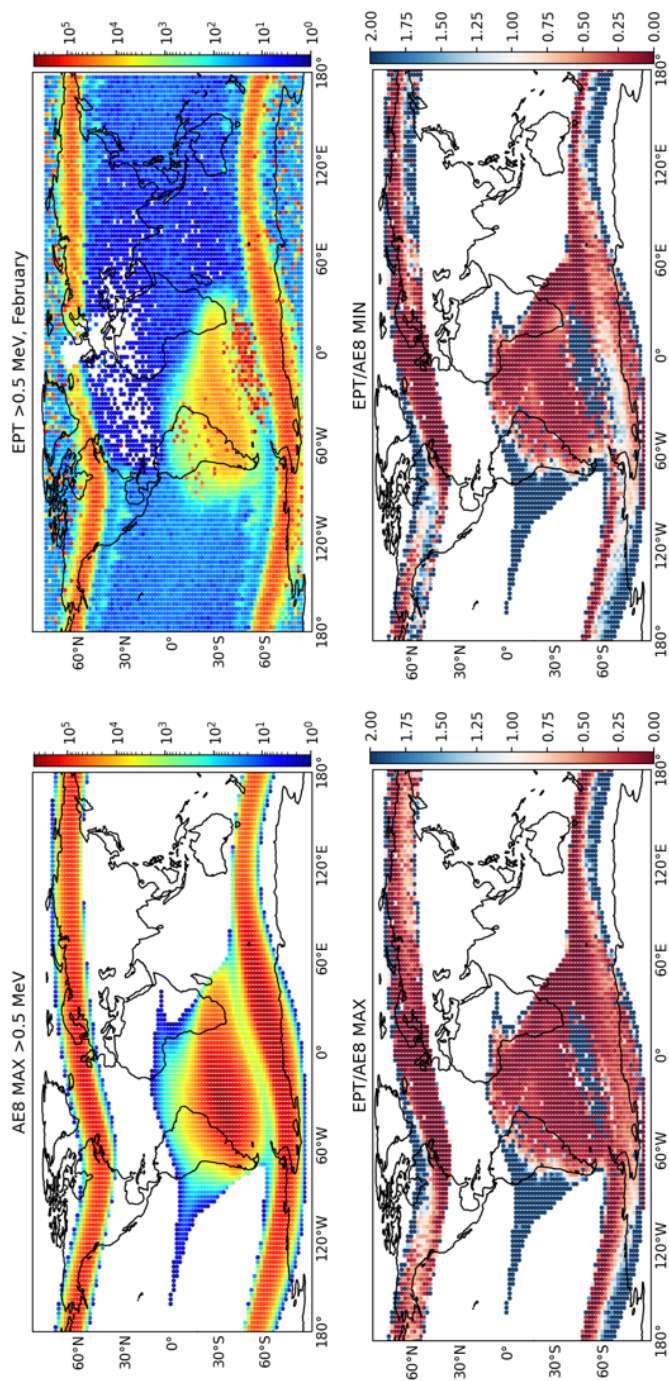

**Figure 3.** Top left: Electron integral fluxes predicted by the AE-8 model at 820 km of altitude during solar maximum. Top right: Integral electron fluxes computed from EPT measurements during February 2014 and averaged on the longitude and latitude in bins ( $3^\circ, 2^\circ$ ) to match the model resolution. Bottom left: ratio between EPT and AE-8 (solar maximum). Bottom right: ratio between EPT and AE-8 (solar minimum).





**Table 1.** EPT and MagEIS channels compared in this work

| EPT           | MagEIS        |
|---------------|---------------|
| 500-600 keV   | 558-639 keV   |
| 700-800 keV   | 692-793 keV   |
| 800-1000 keV  | 840-952 keV   |
| 1000-2400 keV | 970-1279 keV  |
| 2400-8000 keV | 2280-3008 keV |

125 The average of the EPT observations on bins similar to those of the model allows a direct comparison between them. Such  
a comparison is shown on the bottom panels of Figure 3. These two graphs show the ratio between the observations of the  
EPT and the fluxes predicted by the AE8 model, both during maximum (left) and minimum (right) solar activity. In general,  
the model tends to overestimate electron fluxes in the SAA and in the horns (red regions), especially at maximum of solar  
activity. However, fluxes measured by the EPT are higher than predicted in the most western part of the SAA (blue region).  
130 The position of the observed SAA fluxes does not overlap perfectly with the one of the AE8 model. This is a manifestation  
of the motion of the SAA ( $3^\circ$  per year) in the westward direction as a consequence of the secular motion of the geomagnetic  
field Pierrard et al. (2014). Even if this motion is taken into account in the model for which the date has to be specified, it  
seems that there remains some gap. Higher fluxes measured by the EPT are also seen in the outer edges of the polar horns  
at various latitudes. This is also due to the fact that the simulated and measured fluxes in the horns do not perfectly overlap  
135 in these regions. This means that the fluxes are observed to be higher at high L values and thus at high latitudes than what is  
predicted by the model. When considering the model for maximum solar activity, more intense fluxes are observed inside the  
horns. The global overestimation of the model during maximum activity can be attributed to the fact that the amplitude of the  
24th solar cycle is much smaller than the precedent ones, which were used to develop the model.

#### 4 Methodology

140 Both instruments (EPT and MagEIS) are spectrometers that measure the differential fluxes of particle (given in  $s^{-1}cm^2sr^{-1}MeV^{-1}$ )  
in the radiation belts. However, some differences between them are important for the following comparison. First of all, the  
number of energy bins and their width are not the same. For electrons, the EPT has 6 usable energy channels ranging from 500  
keV to 8000 keV, while MagEIS has 21 channels ranging from 33 keV to 4000 keV. Because the flux decreases with energy, in  
order to perform a meaningful comparison between the two instruments, the lower energy edge of the channels to be compared  
145 must be as close as possible. The channels that were compared in this work are shown in Table 1. Note that the second channel  
of the EPT (600-700 keV) was not used since there were no similar channel for the MagEIS instrument.

In addition, the frequency at which the two instruments measure particle fluxes is not the same (every 2s for the EPT and  
every 11s for MagEIS). Data from each instrument are averaged on one hour intervals. Thus, we process new data sets with the  
same time resolution for each instrument. In turn, each time series can be directly compared to one another. Such averages have



150 been performed for a period of three months, from January to March 2014. This time period was selected because it featured the most intense storms of the year and was before the incident of the EPT. In order to allow a better quantitative comparison between the observations performed by the two instruments at different spatial locations, the computed hour-average fluxes are directly plotted on log-log scale scatter plots. Moreover, the outer belt was segmented in narrower 'shells', centered on a given value of L and with a width of  $dL = 0.5$ . Although relatively wide, this shell width allows to compensate for the rather  
155 small period of time used in this analysis. This ensures that enough points are present in the comparison to keep its statistical significance. It is then possible to perform a linear regression on these new data sets in order to compute the Pearson correlation coefficients between the observations of the two instruments. The equation of the regression line is given by:

$$\log_{10}(\bar{\phi}_{EPT}^i) = \beta_0 + \beta_1 \log_{10}(\bar{\phi}_{Mag}^j), \quad (1)$$

where  $\bar{\phi}_{EPT}^i$  and  $\bar{\phi}_{Mag}^j$  are respectively the hour-averaged differential electron fluxes computed from EPT and MagEIS,  $i$  and  
160  $j$  denote the energy channel selected for the corresponding instruments,  $\beta_0$  is the intercept of the regression line and  $\beta_1$  is the slope.

It is also useful to compare the integral flux ( $\#/(s \text{ cm}^2 \text{ sr})$ ) of electrons retrieved with the two instruments. This can be easily done, given the differential flux. Strictly speaking we integrate the differential flux with respect to the energy and on all solid angles. ~~but in practice,~~ <sup>In practice,</sup> we proceed to the following sum,

$$165 \quad \phi_{int}(E > E_0) = 4\pi \sum_{i=0}^N \phi_{diff}(E_i) \Delta E_i \quad (2)$$

where  $\phi_{diff}(E_i)$  is the differential flux measured in the energy bin  $i$  and  $\Delta E_i$  is the width of the channel  $i$ . Thus, the integral flux does not depend on the energy anymore, although it depends on the lowest energy threshold ( $E_0$ ) taken in the sum given above (this is also a consequence of the decrease of the differential flux with the energy). After having retrieved the integral flux, time averages can be computed in order to compare the two instruments.

## 170 5 Results and discussion

### 5.1 Outer belt

Figure 4 shows scatterplot comparison between the differential fluxes of the EPT and MagEIS as described in section 4. Here only two different energy ranges for electrons are displayed, ~~about~~ 500 keV and 1000 keV. The channels selected for both instruments are displayed on each panel of the figure. Each row on this figure also corresponds to a different location in the  
175 outer radiation belt given by the L range. In addition, on each panel, two sets of dots are represented, corresponding to different data types from MagEIS. Blue dots are computed with MagEIS level 2 spin averaged data, not taking electron pitch angle into account, while black dots are computed with MagEIS level 3 pitch angle resolved data, for the lowest possible pitch angle bin, ~~pa~~  $\sim 8^\circ$ .



From this figure, the evolution of the distribution of points with respect to electron energy and L values can be studied. First, the alignment of the data is reasonably good and the Pearson correlation coefficients range between 0.79 and 0.9. Moreover, fluxes of electrons decrease with increasing energy, for both instruments, independently of the pitch angle value and the position in the outer belt. The distribution is shifted downward and to the left. However, the decrease is not the same for the EPT and MagEIS, as indicated by the rapid decrease of the intercept value ( $\beta_0$ ) of the regression line with energy. While for MagEIS the difference in flux between  $\sim 500$  keV and  $\sim 1000$  keV is about one order of magnitude, the difference is about 3 orders of magnitude for the EPT. In addition, the slope of the regression line ( $\beta_1$ ) is always lower than one, indicating that the variation of the flux intensity is in general larger near the equatorial geomagnetic plane than at all low altitude spanned by PROBA-V, and again independently of the pitch angle and the position in the outer belt. MagEIS measurements are systematically higher than those of EPT, except once for the energy of 500 keV, and at  $L \sim 4$ , only for low fluxes (panel e). Those points correspond to the beginning of January 2014, during which fluxes of electrons were unusually low at this location of the belt.

Figure 4 also shows the evolution of the flux-flux distribution as a function of L. For spin averaged MagEIS data (blue dots), the variations scale of the flux is much larger at  $L \sim 4$  than for the higher L values. This is related to the very low fluxes observed in January and the high fluxes associated with the storms of February in this region, leading to a very wide flux range. Such low fluxes were not observed at high L values and are hence not seen in the flux-flux distribution. At  $L \sim 5$  and  $L \sim 6$ , the distribution of points is very different from the one near the inner edge of the belt. This illustrates the different evolution of electron fluxes in the different regions of the outer belt. Indeed, near the inner boundary, fluxes are relatively low until injections lead to sharp flux increase, whereas higher in the outer belt, electrons fluxes remain more intense even during quieter periods. In addition, at high L values, the figure shows the emergence of vertical structures, for which MagEIS fluxes remain relatively constant while a very sharp decrease is observed for the EPT. These structures are caused by dropout events, which are very rapid depletion of electrons in the outer belt during geomagnetic storms. Such events were extensively studied by Pierrard et al. (2020). Dropout events are thus more intense at low altitude than near the equator. Moreover, as they are more frequent at high L values, the structure related to such events are much more prominent for the two top panels of the figure.

While the pitch angle does not affect the variation of the flux with the energy of electrons, the difference in flux intensity between the two instruments is reduced as low pitch angle values are considered (black dots). This effect is very small near the inner edge but increases with L. Note that at  $L \sim 4$  for 500 keV, the lowest fluxes are lost for the low pitch angle value. This is due to the fact that for low pitch angle and corrected MagEIS data, a larger amount of data is lost (see Figure 2). It is clear from graph (a) and (b) of ~~this~~ Figure 2 that fluxes of electrons with a pitch angle of  $\sim 8^\circ$  measured at the equator are more susceptible to the smallest dropouts that occur in the outermost region of the outer belt and are in better agreement with the observations performed at an altitude of 820 km. Indeed, during the month of March, the dropouts that were not observed in the hour-averaged flux computed from spin-averaged data of MagEIS are now observed for low pitch angle electron flux. This leads to much less vertical structures on the scatter plot at low L. In the region of the belt close to the outer edge of the outer belt ( $L \sim 6$ ), a substantial diminution of the slope of the regression line can be observed when taking low pitch angle fluxes rather than spin-averaged ones. This decrease is due to the reduction of the number of points corresponding to less intense or non-observed dropouts by MagEIS compared to the measurements performed by the EPT. Because the lower regions of the



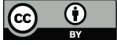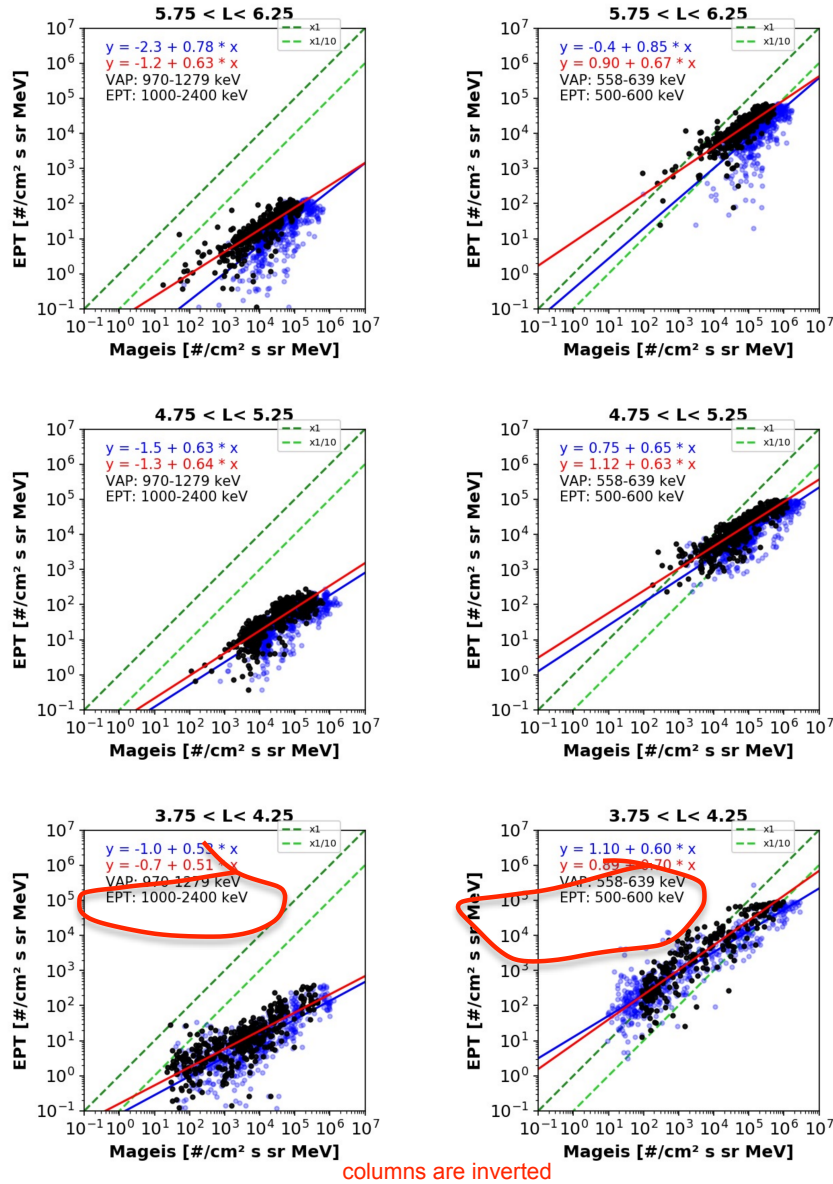

**Figure 4.** Scatterplot of the logarithm of the hour averaged differential electron fluxes from PROBA-V/EPT versus RBSPB/MageIS (blue dots for level 2 data and black dots for level 3 data (pitch angle of 8°)) for two different energy channels (column 1: 500 keV, column2: 1 MeV) and locations in the radiation belts (row 1: L ~ 6, row 2: L ~ 5, row 3: L ~ 4). Blue and red lines represent the best fit of the level 2 data and low pitch angle 8°, respectively. The green lines show perfect linear correlation with a factor of  $\times 1$  and  $\times 10^{-1}$ . Data represented in this graph are from January to March 2014. Pearson correlation coefficient and standard error below each panel are computed with low pitch angle values (i.e., black dot distributions).

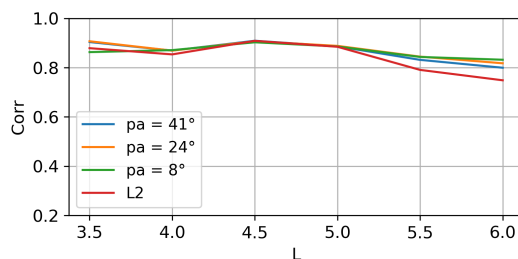

**Figure 5.** Evolution of the correlation coefficients between the logarithm of the integral fluxes computed with the EPT and MagEIS as a function of  $L$  and for different values of the pitch angle and for level 2 spin-averaged MagEIS data. The data in this graph have been taken between January and March 2014.

outer belt are less impacted by the selection of low pitch angle values, such a variation of the slope does not appear at  $L \sim 4$  and at  $L \sim 5$ .

Because the integral flux is no longer dependent on the energy of the electrons, the comparison of the integral flux computed from EPT and MagEIS measurement is only performed for different values of the McIlwain parameter in the outer belt. A similar analysis to that shown in Figure 4 was carried out for integral fluxes but is not displayed here. The results of this comparison are in agreement with the results obtained with the differential fluxes, which should not be surprising, as the integral flux is computed from the differential fluxes. The first observation is that the integral flux measured near the equator is almost always higher than that observed at low altitude, as expected from the bounce motion of the particles along the drift shells Pierrard et al. (2021). EPT fluxes are higher than those recorded by MagEIS only near the inner edge of the outer belt ( $L \sim 4$ ), when both fluxes are relatively low. This is the case for both spin-averaged and low pitch angle electron fluxes. Also, the difference in flux intensity between the two instruments is reduced by considering fluxes of electrons with a pitch angle of  $\sim 8^\circ$ . Indeed at  $L \sim 4,5$ , while MagEIS spin-averaged integral flux is  $\sim 50$  times higher than the integral flux computed with the EPT, small pitch angle fluxes are  $\sim 20$  times higher. The same is true at  $L \sim 6$  where MagEIS flux is  $\sim 30$  times larger than for the EPT and becomes  $\sim 10$  times larger when the integral flux is computed with  $\sim 8^\circ$  pitch angle electrons. This also shows that in the outer part of the outer belt, the difference in flux intensity between MagEIS and the EPT is smaller than for the center and the inner part of the belt. This is valid for both spin-averaged and pitch angle resolved data. As it was previously observed, the impact of the selection of low pitch angle electron fluxes is more important in the outer regions of the outer belt ( $L \geq 5$ ). An improvement of the correlation is seen compared to the one computed with spin-averaged data, especially at  $L \sim 6$ . Also, comparing small pitch angle fluxes with EPT observations at  $L \leq 4.5$  leads to a very small decrease in the correlation.

The evolution of the correlation between the integral flux computed with MagEIS and the EPT as a function of  $L$  is presented in Figure 5. The correlation is computed for spin-averaged data as well as for different pitch angle values, namely  $\sim 8^\circ$ ,  $\sim 24^\circ$ ,  $\sim 41^\circ$ . This graph shows that even when considering the level-2 spin averaged data from MagEIS, fluxes at low altitude and near geomagnetic equator have a good correlation ( $\text{corr} > 0.7$ ) at all  $L$  values. It appears on this figure that for  $L > 5$ , even by



considering electrons with pitch angle  $\sim 41^\circ$ , the correlation between the instruments is significantly improved. Moreover, by considering successively smaller values of the pitch angle, correlation is further increased. For the lowest pitch angle value, the correlation between the EPT and MagEIS is larger than 0.8 throughout the outer belt. Note that the slight decrease of the correlation at  $L \sim 4$  with decreasing pitch angle is most likely caused by the diminution of the number of points used for the regression with the decrease of the pitch angle. This can clearly be seen in Figure 2. The results obtained here are comparable to the results of the comparison of the measurements from instruments in VAPs and Arase, which have a similar orbit Szabó-Roberts et al. (2021).

## 5.2 Conjunctions to study the inner belt

Finally, the electron fluxes measured by RBSP-A/MagEIS and EPT during the whole period of conjoint operation, i.e. 2013-2019, were employed to compare the fluxes when the satellites were located as close as possible. For this analysis as the EPT data time resolution is 2 seconds and for MagEIS it is 11 seconds, both series of data were averaged to 15 seconds. In order to find the closest space-time conjunctions between both satellites for a better validation, the following conditions were simultaneously imposed between both time series :  $DL \leq 0.02$  and  $DB \leq 0.01$ , where DL and DB accounts for the absolute difference between the corresponding McIlwain L-shell coordinates and Magnetic Fields of the satellites at a particular time. Due to the very different orbits of both satellites, polar at LEO for PROBA-V versus a highly elliptic LEO-MEO for RBSP, after application of the conjunction condition only some hundreds of observations remain useful to perform the correlation. All are located close to the equator and at very low L ( $L \leq 1.4$ ), as illustrated in Figure 7, inside and outside the SAA. Figure ?? displays the correlations between the two first energy channels of Table 1. The linear regression (yellow line) demonstrates a relatively good agreement, in particular for the lower energies, in line with previous comparisons. The red line corresponds to perfect linear correlation with a factor of 1. The correlation coefficient (indicated at the top of the panels after the linear fit) should be taken with care since the resulted conjunction points are very few (even without the application of any additional flags for MagEIS data), located in the region of the South Atlantic Anomaly where contamination from energetic protons can be high, and imposed corrections for MagEIS measurements Claudepierre et al. (2015).

## 6 Conclusions

The year 2014 was relatively quiet in terms of magnetic activity compared to the following years. From January to June, geomagnetic activity was low on average, although this period saw the largest storms of the year, especially in February. Conversely, the rest of the year was characterized by a higher magnetic intensity, with lower Dst value on average, but no major event occurred during this period. This can also be seen in the flux intensity measured by the EPT throughout the year, with more intense electron fluxes toward the end of the year. Due to the lack of injections of electrons to very low L values, the very stable nature of the inner belt is clearly displayed, even for the storm of February 19<sup>th</sup>. However, the variations of electron flux in the outer belt with the geomagnetic activity are well observed for the February storms. In the present work, integral fluxes of electrons obtained from EPT measurement were directly compared with the NASA AE8 empirical model.

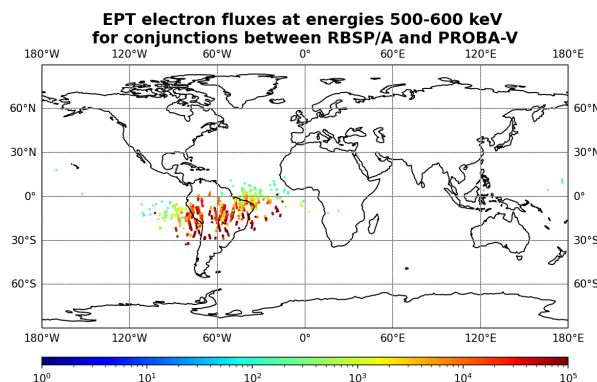

**Figure 6.** EPT electron differential fluxes [ $\#/\text{cm}^2 \text{ s sr MeV}$ ] that follow the condition  $DL \leq 0.02$  and  $DB \leq 0.01$  between the L coordinates and the magnetic fields, respectively, of both satellites RBSP/A and PROBA-V.

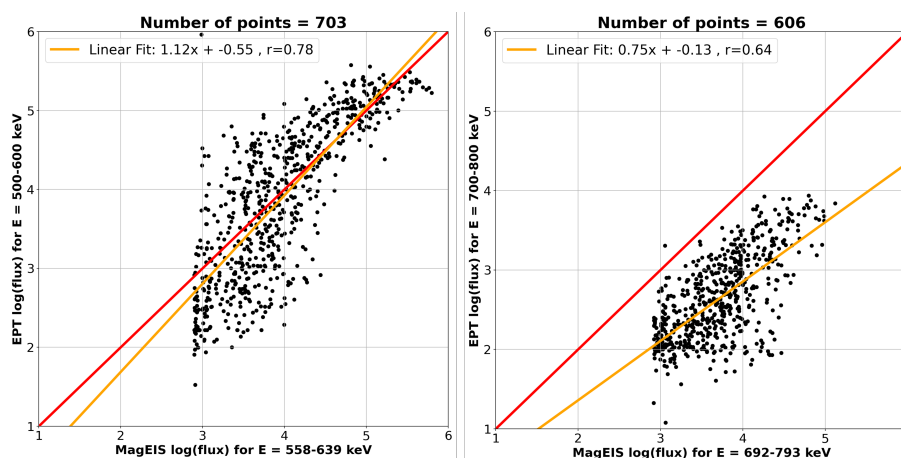

**Figure 7.** EPT electron differential fluxes [ $\#/\text{cm}^2 \text{ s sr MeV}$ ] that follow the condition  $DL \leq 0.02$  and  $DB \leq 0.01$  between the L coordinates and the magnetic fields, respectively, of both satellites RBSP/A and PROBA-V.

Because the model can only distinguish between maximum and minimum of solar activity, injections of electrons and protons during magnetic storms and SEP events respectively cannot be reproduced. However, the model is able to well represent the main features of the radiation belts at low altitudes. Flux intensity in the horns is in general higher in the model than in the observations. This overestimation of the flux by the model is also seen in the SAA. The difference in flux intensity between the model and the observations is much larger in the SAA than in the horns due to lack of injection of electrons in this region in 2014. The comparison of the measurements of energetic electron fluxes in the outer radiation belts was conducted with the use of two science class spectrometers, namely the EPT and MagEIS, on board different spacecraft with very different orbits. This comparison was performed for various electron energies and locations in the outer belt. Moreover, the effect of the pitch angle for near equatorial electrons was tested between January and March 2014. The comparison between EPT fluxes and



spin-averaged fluxes from MagEIS clearly shows that fluxes of electrons decrease with energy, but more importantly, it shows that this decrease is much more abrupt at low altitudes than near the equator. In addition, it is quite evident on the scatter plots that the observations of dropout events are not the same for the two instruments. This difference in measurements is reflected by vertical structures on the scatter plots, showing sharper decrease of the flux at low altitude. Consideration of low pitch angle ( $\sim 8^\circ$ ) electrons has two distinct effects on the results of the comparison. The first one is the reduction of the difference in flux intensity measured by the two instruments at all energy levels and at all L values. Such a reduction in flux intensity is also observed for the integral flux, but equatorial low pitch angle fluxes remain one order of magnitude higher than those at low altitude in the outer belt. This is logical due to the motion of the particles along the drift shells: only electrons with low pitch angles are able to reach the low altitudes and high latitude regions where the EPT makes measurements. The second effect is the reduction of the number of vertical structures associated with dropout events, showing that they are more alike than for spin-averaged data. Moreover, even considering spin-averaged data from MagEIS, observations from the two instruments show a good correlation. However, it is clear that when considering low pitch angle electrons, the correlation in the outer region of the outer belt is significantly improved. A relatively good correlation is also obtained in the inner belt where the electron fluxes comparisons are performed considering the whole period of mutual operation of both instruments at their closest space-time conjunctions.

in the equatorial plane

*Data availability.* EPT data used in the study are available at <https://swe.ssa.esa.int/space-radiation> MagEIS data used in this study are available at [https://rbsp-ect.newmexicoconsortium.org/data\\_pub/](https://rbsp-ect.newmexicoconsortium.org/data_pub/).

*Author contributions.* AW made the present analyses and wrote the manuscript with the contribution of the other authors. VP conceptualized and supervised the study, and contributed to the interpretation of the results. EB helped in the development of the codes and contributed to the analyses. All authors contributed to writing of the manuscript through reviews and edits.

*Competing interests.* The authors declare that they have no conflict of interest.

*Acknowledgements.* The project 21GRD02 BIOSPHERE has received funding from the European Partnership on Metrology, co-financed from the European Union's Horizon Europe Research and Innovation Programme and by the Participating States. VP and EB thank the International Space Science Institute (ISSI) and the participants in the ISSI workshop for the project "Radiation belts physics".



## References

- Baker, Kanekal, S., Hoxie, V., Henderson, M., Li, X., Spence, H. E., and al: A long-lived relativistic electron storage ring embedded in Earth's outer Van Allen belt, *Science*, 340, 186–190, 2013.
- 305 Baker, Jaynes, A., Hoxie, V., Thorne, R., Foster, J., Li, X., and al: An impenetrable barrier to ultrarelativistic electrons in the Van Allen radiation belts, *Nature*, 515, 531–534, 2014.
- Baker, Zhao, H., Li, X., Kanekal, S. G., Jaynes, A. N., Kress, B. T., and al: Comparison of Van Allen Probes energetic electron data with corresponding GOES-15 measurements: 2012–2018, *Journal of Geophysical Research: Space Physics*, 124, 9924–9942, 2019.
- Boyd, A., Reeves, G., Spence, H., Funsten, H., Larsen, B., Skoug, R., Blake, J., Fennell, J., Claudepierre, S., Baker, D., and al: RBSP-ECT  
310 combined spin-averaged electron flux data product, *Journal of Geophysical Research: Space Physics*, 124, 9124–9136, 2019.
- Claudepierre, S., O'Brien, T., Blake, J., Fennell, J., Roeder, J., Clemmons, J., and al: A background correction algorithm for Van Allen Probes MagEIS electron flux measurements, *Journal of Geophysical Research: Space Physics*, 120, 5703–5727, 2015.
- Cyamukungu, M. and Grégoire, G.: The Energetic Particle Telescope (EPT) concept and performances, in: *Solar Physics and Space Weather Instrumentation IV*, International Society for Optics and Photonics, 2011.
- 315 Cyamukungu, M., Benck, S., Borisov, S., Grégoire, G., Cabrera, J., Bonnet, J.-L., and al: The Energetic Particle Telescope (EPT) on board PROBA-V: description of a new science-class instrument for particle detection in space, *IEEE Transactions on Nuclear Science*, 61, 3667–3681, 2014.
- Koskinen, E. K. J. K.: *Physics of Earth's Radiation Belts*, Springer, 2022.
- Mansilla, G. A.: Solar cycle and seasonal distribution of geomagnetic storms with sudden commencement, *Earth Science Research*, 3, 1, 2014.
- 320 Pierrard, V. and Lopez Rosson, G.: The effects of the big storm events in the first half of 2015 on the radiation belts observed by EPT/PROBA-V, in: *Annales Geophysicae*, Copernicus GmbH, 2016.
- Pierrard, V., Rosson, G. L., Borremans, K., Lemaire, J., Maes, J., Bonnewijn, S., and al: The energetic particle telescope: first results, *Space Science Reviews*, 184, 87–106, 2014.
- Pierrard, V., Lopez Rosson, G., and Botek, E.: Dynamics of megaelectron volt electrons observed in the Inner Belt by PROBA-V/EPT,  
325 *Journal of Geophysical Research: Space Physics*, 124, 1651–1659, 2019.
- Pierrard, V., Botek, E., Ripoll, J.-F., and Cunningham, G.: Electron Dropout Events and Flux Enhancements Associated With Geomagnetic Storms Observed by PROBA-V/Energetic Particle Telescope from 2013 to 2019, *Journal of Geophysical Research: Space Physics*, 125, e2020JA028 487, 2020.
- Pierrard, V., Ripoll, J.-F., Cunningham, G., Botek, E., Santolik, O., Thaller, S., and al: Observations and simulations of dropout events and  
330 flux decays in October 2013: Comparing MEO equatorial with LEO polar orbit, *Journal of Geophysical Research: Space Physics*, 126, e2020JA028 850, 2021.
- Reeves, G. D., Friedel, R. H., Larsen, B. A., Skoug, R. M., Funsten, H. O., and Claudepierre, S. G. a.: Energy-dependent dynamics of keV to MeV electrons in the inner zone, outer zone, and slot regions, *Journal of Geophysical Research: Space Physics*, 121, 397–412, 2016.
- Sandberg, I., Jiggins, P., Evans, H., Papadimitriou, C., Aminalragia-Giamini, S., Katsavrias, C., and al: Harmonization of RBSP and ARASE  
335 energetic electron measurements utilizing ESA radiation monitor data, *Space Weather*, 19, e2020SW002 692, 2021.
- Shi, R., Summers, D., Ni, B., Fennell, J. F., Blake, J. B., Spence, H. E., and Reeves, G. D.: Survey of radiation belt energetic electron pitch angle distributions based on the Van Allen Probes MagEIS measurements, *Journal of Geophysical Research: Space Physics*, 121, 1078–1090, 2016.

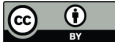

- Smirnov, A., Shprits, Y., Allison, H. J., Aseev, N., Drozdov, A., Kollmann, P., and al: Storm-Time Evolution of the Equatorial Electron Pitch  
340 Angle Distributions in Earth's Outer Radiation Belt, *Frontiers in Astronomy and Space Sciences*, 9, 2022.
- Szabó-Roberts, M., Shprits, Y. Y., Allison, H. J., Vasile, R., Smirnov, A. G., and Aseev, N. A. a.: Preliminary Statistical Comparisons of  
Spin-Averaged Electron Data From Arase and Van Allen Probes Instruments, *Journal of Geophysical Research: Space Physics*, 126,  
e2020JA028 929, 2021.
- Vette, J. I.: The AE-8 trapped electron model environment, vol. 91, National Space Science Data Center (NSSDC), World Data Center A for  
345 Rockets, 1991.
